# Supplementary material for: Distinctive Expression and Amplification of Genes at 11q13 in Relation to HPV Status with Impact on Survival in Head and Neck Cancer Patients
Source: MDPI journal article supplement (doi:10.3390/jcm7120501), 2018-12-01
Supplement: s1 [file s1]

## SUPPLEMENTARY INFORMATION

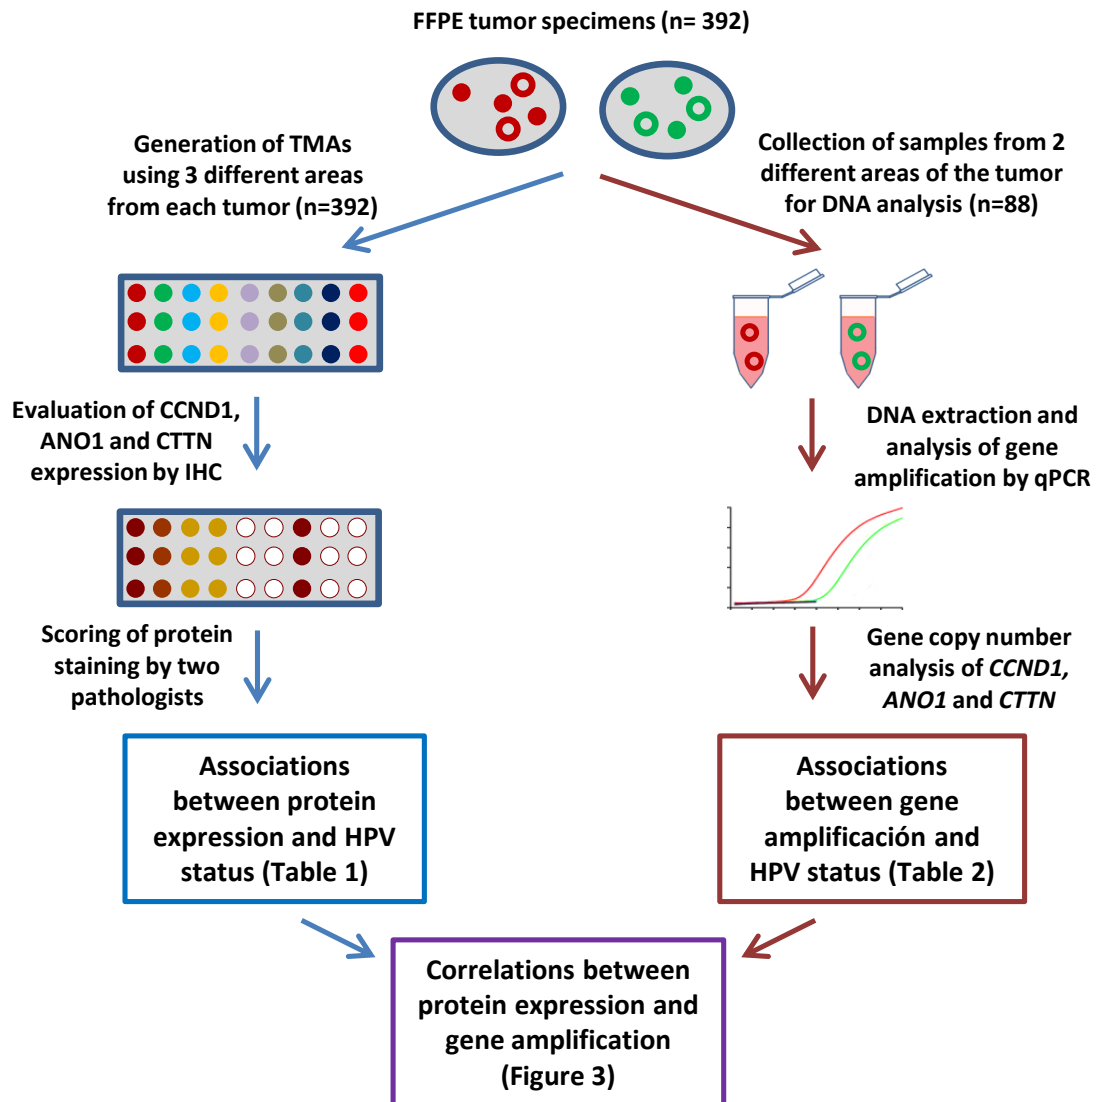

**Supplementary Figure S1.** Schematic representation of the experimental setup designed to analyze CCND1, ANO1 and CTTN protein expression and gene amplification in relation to HPV status in a cohort of 392 HNSCC patients.

**Supplementary Table S1:** Clinicopathologic features of the validation cohort of 279 HNSCC patients from the TCGA

|                                      | <b>HPV -</b>        | <b>HPV +</b>      |
|--------------------------------------|---------------------|-------------------|
| <b>Gender (Age)</b>                  |                     |                   |
| Male                                 | 171 (60.4 +/- 11.8) | 32 (58.5 +/- 9.9) |
| Female                               | 72 (65.2 +/- 13.3)  | 4 (53 +/- 17.6)   |
| <b>Tumor site (%)</b>                |                     |                   |
| Oral cavity                          | 160 (66)            | 12 (33)           |
| Oropharynx                           | 11 (4)              | 22 (61)           |
| Hipopharynx                          | 1 (<1)              | 1 (3)             |
| Larynx                               | 71 (29)             | 1 (3)             |
| <b>Stage (%)</b>                     |                     |                   |
| I                                    | 9 (4)               | 0 (0)             |
| II                                   | 49 (20)             | 8 (22)            |
| III                                  | 64 (27)             | 3 (8)             |
| IV a                                 | 113(47)             | 23 (64)           |
| IV b                                 | 5 (2)               | 2 (6)             |
| <b>Tobacco history (%)</b>           |                     |                   |
| Life-long non smoker                 | 42 (17)             | 10 (28)           |
| Current reformed smoker for > 15 yrs | 45 (18)             | 4 (11)            |
| Current reformed smoker for <=15 yrs | 69 (28)             | 12 (33)           |
| Current smoker                       | 80 (33)             | 10 (28)           |
| <b>Alcohol history (%)</b>           |                     |                   |
| Yes                                  | 158 (65)            | 30 (83)           |
| No                                   | 80 (33)             | 5 (14)            |
| <b>Total Patients (%)</b>            | 243 (87)            | 36 (13)           |

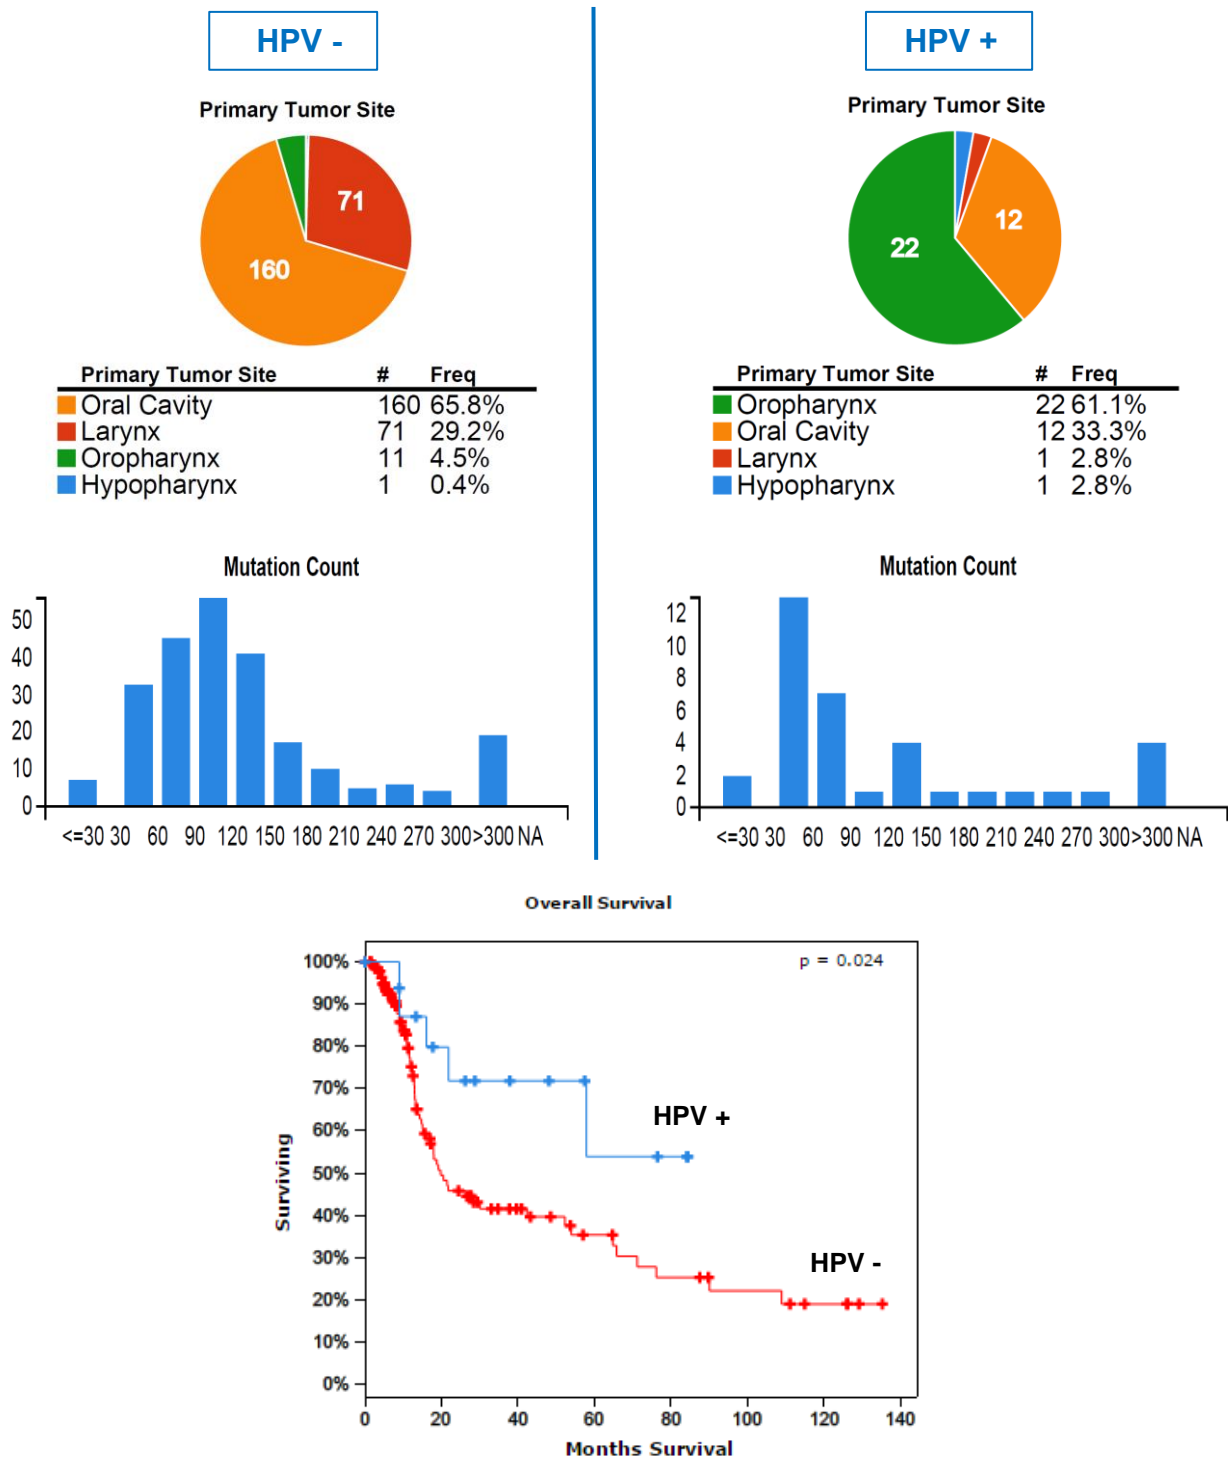

**Supplementary Figure S2. Clinical and molecular features of the TCGA cohort of 279 HNSCC patients, according to the HPV status.** Schematic representation showing the HPV incidence by HNSCC subsites, mutation frequencies and Kaplan-Meier survival curves ( $P = 0.024$ , Log-rank test).
